# Supplementary material
Source: PubMed Central journal article supplement (PMC5960971)
Supplement: AEM.00403-18_zam011188521s1.pdf [file AEM.00403-18_zam011188521s1.pdf]

### A) Cellobiose

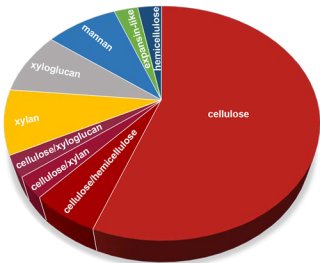

### B) L-Rhamnose

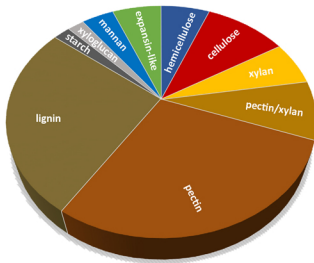

### C) D-Xylose

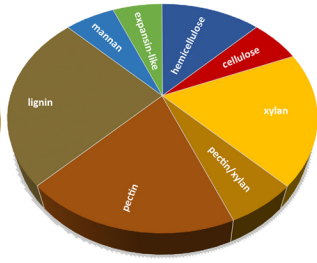

**Supplementary figure 1:** The proportion of induced CAZy genes of dikaryotic *D. squalens* FBCC312 on A) cellobiose, B) L-rhamnose and C) D-xylose, putatively targeted towards different components of plant cell wall. Genes were expressed at least 2.5 fold higher compared to D-glucose with p-value  $\leq 0.01$  and had a FPKM value  $> 10$ .
